# Supplementary material for: Spring and summer time ozone and solar ultraviolet radiation variations over Cape Point, South Africa
Source: Copernicus journal article supplement (doi:10.5194/angeo-2018-56), 2018-06-07
Supplement: Supplementary file [file angeo-2018-56-AC2-supplement.pdf]

**Table 1: Summary of the instruments and their calibration information**

| <b>Instrument</b>                   | <b>Period of Operation</b>   | <b>Calibration Information</b> |
|-------------------------------------|------------------------------|--------------------------------|
| Instrument 3719                     | January 2007 – March 2016    | Solar Light – June 2006        |
| Instrument 1103                     | April 2016 – December 2016   | Solar Light – June 2006        |
| <b>Inter-comparison Instruments</b> | <b>Inter-comparison Date</b> | <b>Calibration Information</b> |
| Instruments 3719 and 12010          | October 2012                 | 12010: DWD – August 2012       |
| Instruments 3719 and 2722           | January 2014                 | 2722: DWD – July 2013          |
| Instruments 1103 and 12010          | November 2016                | 12010: Solar Light – June 2015 |

**Table 2. The correlation statistics for amount of ozone and *UVI* at Cape Point on clear-sky days** (\*indicates  $R^2$  values were statistically significant at a 95 % confidence interval).

| <b>SZA (°)</b> | <b>TOC: <math>R^2</math><br/>Expo fit</b> | <b>SCO: <math>R^2</math><br/>Expo fit</b> | <b>RAF</b>  |
|----------------|-------------------------------------------|-------------------------------------------|-------------|
| 15             | 0.25*                                     | 0.18*                                     | 1.60        |
| 20             | 0.26*                                     | 0.23*                                     | 0.19        |
| 25             | 0.45*                                     | 0.53*                                     | 0.26        |
| 30             | 0.28*                                     | 0.20*                                     | 0.82        |
| 35             | 0.21*                                     | 0.11*                                     | 0.15        |
| 40             | 0.30*                                     | 0.30*                                     | 0.42        |
| 45             | 0.26*                                     | 0.29*                                     | 0.69        |
| <b>Average</b> |                                           |                                           | <b>0.59</b> |

**Table 3. Identified low-ozone events on clear-sky days at Cape Point during spring and summer months and the percentage decrease calculated from the relative climatological monthly mean (\* indicates whether the low-ozone event was due to low TOC and/or low SCO values).**

| <b>Date</b> | <b>TOC (DU)</b> | <b>SCO (DU)</b> | <b>Decrease<br/>TOC (%)</b> | <b>Decrease<br/>SCO (%)</b> | <b>Increase<br/>UVI (%)</b> |
|-------------|-----------------|-----------------|-----------------------------|-----------------------------|-----------------------------|
| 30 Jan 2009 | 253.5*          | 210.4*          | 6.1                         | 10.1                        | 30.4                        |
| 6 Feb 2009  | 253.9*          | 222.2*          | 5.0                         | 4.5                         | 36.2                        |
| 15 Feb 2009 | 254.6*          | 228.3           | 4.7                         | 1.9                         | 34.2                        |
| 28 Feb 2011 | 255.7*          | 223.2*          | 4.3                         | 4.1                         | 6.8                         |
| 16 Jan 2012 | 268.2           | 221.9*          | 0.6                         | 5.1                         | 21.2                        |
| 8 Feb 2012  | 257.0*          | 227.5           | 3.8                         | 2.2                         | 31.7                        |
| 13 Nov 2012 | 256.6*          | 228.8           | 13.3                        | 13.3                        | 46.5                        |
| 14 Nov 2012 | 261.3*          | 234.6           | 11.7                        | 11.1                        | 42.1                        |
| 6 Sep 2013  | 265.0*          | 241.3*          | 12.7                        | 11.6                        | 22.3                        |
| 9 Nov 2013  | 282.3           | 229.0*          | 4.6                         | 13.3                        | 21.9                        |
| 1 Sep 2014  | 274.7*          | 223.9*          | 9.5                         | 18.0                        | -2.5                        |
| 2 Sep 2014  | 258.4*          | 231.2*          | 14.9                        | 15.3                        | -2.3                        |
| 9 Sep 2014  | 284.0*          | 232.3*          | 6.4                         | 14.9                        | -5.5                        |
| 11 Jan 2016 | 270.6           | 221.9*          | -0.3                        | 5.1                         | -7.9                        |
